# Supplementary figures and images for: Diaminocyclopentane-derived O-GlcNAcase inhibitors for combating tau hyperphosphorylation in Alzheimer's disease
Source: Royal Society of Chemistry journal article supplement (doi:10.1039/d2cc02712g), 2022-01-01

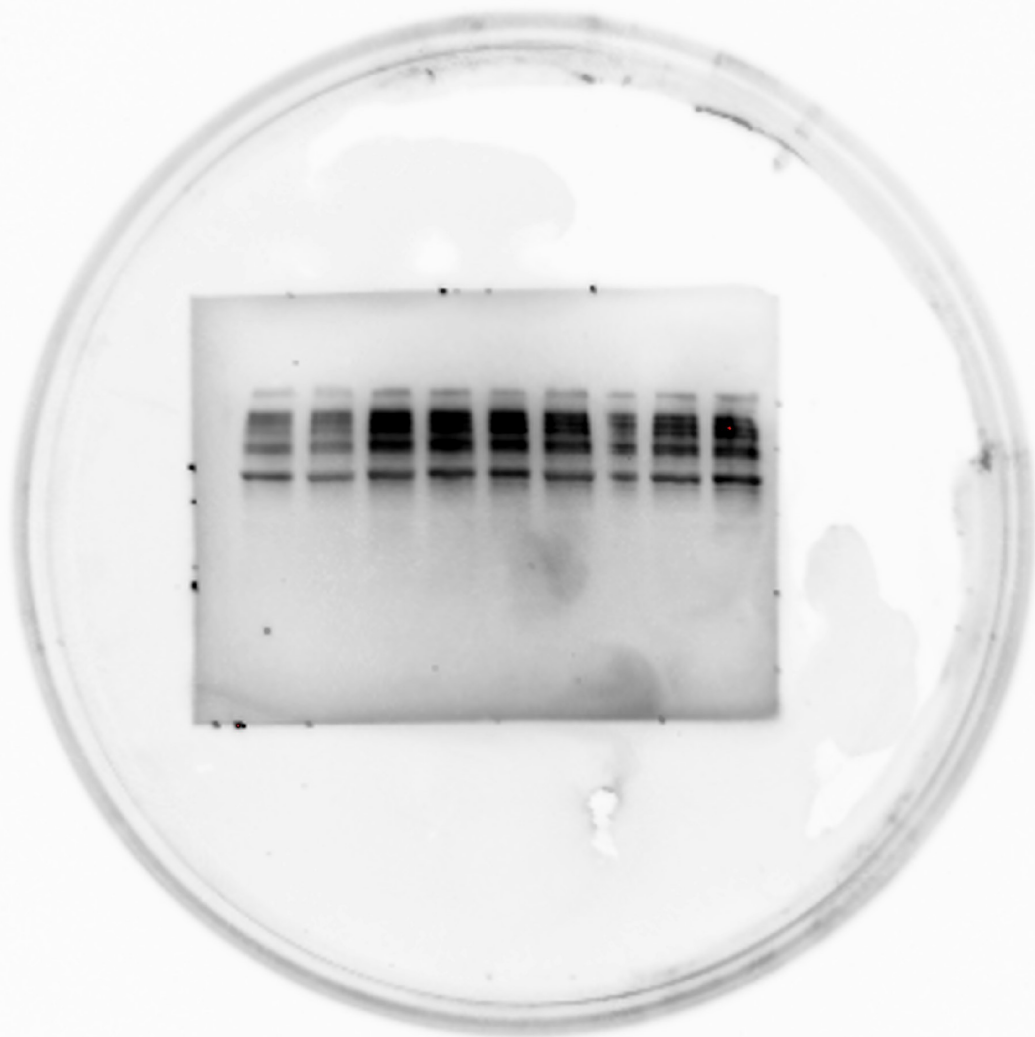

Supplement: d2cc02712g1.pdf [file d2cc02712g1.pdf]
